# Supplementary material for: Amelioration of the Oxidative Stress Generated by Simple or Combined Abiotic Stress through the K+ and Ca2+ Supplementation in Tomato Plants
Source: PubMed Central journal article supplement (PMC6523471; doi:10.3390/antiox8040081), 2019-03-30

**Supplementary Table S1.** Nutritional composition of the Hoagland solution used for tomato plants growth.

|                                                                                    | Concentration stock solution (mM) | Grams of compound used (g) | Volume of stock solution per liter for full strength (mL) | Element   | Final concentration of each element |
|------------------------------------------------------------------------------------|-----------------------------------|----------------------------|-----------------------------------------------------------|-----------|-------------------------------------|
| <b>Compound</b>                                                                    | <b>Macronutrients</b>             |                            |                                                           |           |                                     |
| KNO <sub>3</sub>                                                                   | 1,000                             | 101.10                     | 6.0                                                       | N         | 14 mM                               |
| Ca(NO <sub>3</sub> ) <sub>2</sub> ·4H <sub>2</sub> O                               | 1,000                             | 236.16                     | 4.0                                                       | <b>K</b>  | <b>7 mM</b>                         |
| NH <sub>4</sub> H <sub>2</sub> PO <sub>4</sub>                                     | 1,000                             | 115.08                     | 2.0                                                       | <b>Ca</b> | <b>4 mM</b>                         |
| MgSO <sub>4</sub> ·7H <sub>2</sub> O                                               | 1,000                             | 246.48                     | 1.0                                                       | P         | 1 mM                                |
|                                                                                    |                                   |                            |                                                           | S         | 1 mM                                |
|                                                                                    |                                   |                            |                                                           | Mg        | 1 mM                                |
|                                                                                    | <b>Micronutrients</b>             |                            |                                                           |           |                                     |
| KCl                                                                                | 50 mM                             | 3.728                      | 1.0                                                       | Cl        | 50 μM                               |
| H <sub>3</sub> BO <sub>3</sub>                                                     | 25 mM                             | 1.546                      | 1.0                                                       | B         | 25 μM                               |
| MnSO <sub>4</sub> ·H <sub>2</sub> O                                                | 2 mM                              | 0.338                      | 1.0                                                       | Mn        | 2.0 μM                              |
| ZnSO <sub>4</sub> ·7H <sub>2</sub> O                                               | 2 mM                              | 0.575                      | 1.0                                                       | Zn        | 2.0 μM                              |
| CuSO <sub>4</sub> ·5H <sub>2</sub> O                                               | 0.5 mM                            | 0.125                      | 1.0                                                       | Cu        | 0.5 μM                              |
| (NH <sub>4</sub> ) <sub>6</sub> Mo <sub>7</sub> O <sub>24</sub> ·4H <sub>2</sub> O | 0.5 mM                            | 0.088                      | 1.0                                                       | Mo        | 0.5 μM                              |
| Fe-EDTA                                                                            |                                   | 18.6                       | 1.0                                                       | Fe        | 20 μM                               |

**Supplementary Table S2.** Primers used for the quantification of the expression levels of the oxidative metabolism-related transcripts by qPCR.

| <b>Gen</b>         | <b>Accession (SGN)</b> | <b>Forward</b>           | <b>Reverse</b>          |
|--------------------|------------------------|--------------------------|-------------------------|
| <i>SIFe-SOD</i>    | Solyc06g048410         | taaatagagactttggtcc      | tatattgcctctaacct       |
| <i>SICu/Zn-SOD</i> | Solyc11g066390         | ggccaatctttgaccttta      | agtccaggagcaagtccagt    |
| <i>SICATI</i>      | Solyc12g094620         | tgatcgcgagaagatacctg     | cttcacgttcatggacaac     |
| <i>SlcAPX</i>      | Solyc06g005160         | tctgaattgggatttctga      | cgctaacgtagctgcaaaa     |
| <i>SIDHARI</i>     | Solyc05g054760         | agggtgctcttgacacttc      | cttcagccttggtttctgg     |
| <i>SIMDHARI</i>    | Solyc08g081530         | caagggttcggttccttct      | ctgcatttctctccaact      |
| <i>SIGRI</i>       | Solyc09g091840         | ttggtggaacgtgtttctt      | tctcattcattccatcca      |
| <i>SIGST</i>       | Solyc01g086680         | tactcgtttttggctcgtt      | caccgattcaactcctctg     |
| <i>SIGPX</i>       | Solyc08g080940         | acggagcaagcgacaattgacaac | cgattgattcaccgaaagctcgt |
| <i>SINADPH ox.</i> | Solyc08g081690         | agggaatgatagagcgtcg      | catcgtcattggacttggc     |
| <i>SIPhGPX</i>     | Solyc06g073460         | tggcttgagcactacaggtg     | ttcgtaggcagggaagaag     |

**Supplementary Table S3.** Relative expression values of the oxidative metabolism-related transcripts. Values were normalized against control samples and log<sub>2</sub> was calculated and shown. Values are means of n = 3.

|                    | 25°C    |             |             | 35°C        |             |                |
|--------------------|---------|-------------|-------------|-------------|-------------|----------------|
|                    | Control | Salinity    | Sal+K/Ca    | Heat        | Sal+Heat    | Sal+Heat +K/Ca |
| <i>SIFeSOD</i>     | 0       | 2.42158333  | 2.05563333  | 0.39758333  | 3.48083333  | 4.06833333     |
| <i>SICuZnSOD</i>   | 0       | 2.461       | 2.456       | 0.59833333  | 0.74075     | 1.471          |
| <i>SICAT</i>       | 0       | 1.9568      | 1.02815     | 5.39906667  | -0.8524     | -0.6534        |
| <i>SIAPX</i>       | 0       | -2.03426667 | -0.56526667 | -0.02673333 | -3.2169     | 1.4108         |
| <i>SIDHAR</i>      | 0       | -0.907      | 4.28613333  | 2.04283333  | 0.589       | 2.60916667     |
| <i>SIMDHAR</i>     | 0       | 3.9126      | 1.0466      | 3.27356667  | -4.47423333 | 3.4462         |
| <i>SIGR</i>        | 0       | 0.26366667  | 0.02916667  | -0.48366667 | 0.11533333  | 5.75166667     |
| <i>SINADPH ox.</i> | 0       | -3.24581549 | 2.25544873  | 0.58474158  | 1.02254785  | 0.84578553     |
| <i>SIGST</i>       | 0       | -0.36483333 | -1.10666667 | 1.62233333  | -0.56686667 | 1.62416667     |
| <i>SIGPX</i>       | 0       | -0.36483333 | 1.10666667  | -0.62233333 | -2.56686667 | -0.62416667    |
| <i>SIPhGPX</i>     | 0       | -2.28666667 | 3.4692      | -2.08916667 | -3.78433333 | 1.68366667     |

**Supplementary Table S4.** Absolute activities of the oxidative metabolism-related enzymes. Values obtained were normalized using soluble protein content of each sample and treatment. Values are the means  $\pm$ SE (n=3).

|                  | 25°C    |            |            | 35°C       |            |                |
|------------------|---------|------------|------------|------------|------------|----------------|
|                  | Control | Salinity   | Sal+K/Ca   | Heat       | Sal+Heat   | Sal+Heat +K/Ca |
| <i>SOD</i>       | 3.87    | 7.88397761 | 14.8276913 | 5.25738401 | 12.5794411 | 7.5644212      |
| <i>CAT</i>       | 11.57   | 24.7008567 | 25.0222683 | 17.1339269 | 60.7050015 | 6.91760787     |
| <i>APX</i>       | 22.39   | 7.769575   | 18.5499068 | 23.758835  | 7.01665118 | 33.596195      |
| <i>DHAR</i>      | 17.03   | 9.97439408 | 28.1130161 | 22.8185266 | 18.5127943 | 20.8190521     |
| <i>MDHAR</i>     | 11.25   | 13.1362593 | 12.7675169 | 10.0775882 | 11.5005558 | 12.7675169     |
| <i>GR</i>        | 29.65   | 6.12922478 | 51.1977443 | 31.5015336 | 14.001947  | 36.1420557     |
| <i>NADPH ox.</i> | 9.36    | 5.6815063  | 11.1636462 | 2.62508918 | 3.94031227 | 9.99855759     |

**Supplementary Table S5.** Log<sub>2</sub> of the oxidative metabolism-related enzymes. Values obtained in Supplementary Table S4 were normalized against control and log<sub>2</sub> was calculated.

|                  | 25°C    |             |             | 35°C        |             |                   |
|------------------|---------|-------------|-------------|-------------|-------------|-------------------|
|                  | Control | Salinity    | Sal+K/Ca    | Heat        | Sal+Heat    | Sal+Heat<br>+K/Ca |
| <b>SOD</b>       | 0       | 1.02659011  | 1.93788852  | 0.44201155  | 1.70066236  | 0.96689613        |
| <b>CAT</b>       | 0       | 1.09417221  | 1.11282371  | 0.56646698  | -2.39142652 | -0.74204372       |
| <b>APX</b>       | 0       | -1.52694694 | -0.27144259 | 0.08560957  | -1.67399998 | 0.58544332        |
| <b>DHAR</b>      | 0       | -0.77177733 | 0.72315981  | 0.42212721  | 0.12044424  | 0.28982595        |
| <b>MDHAR</b>     | 0       | 0.22362951  | 0.18255297  | -0.15877459 | 0.03177858  | 0.18255297        |
| <b>GR</b>        | 0       | -2.27425559 | 0.78804814  | 0.08738996  | -1.08240465 | 0.28564646        |
| <b>NADPH ox.</b> | 0       | -0.72023506 | 0.25422787  | -1.83414209 | -1.24819856 | 0.09521145        |

**Supplementary Figure S1.** Fresh weight (FW) of tomato plants obtained at the end of the preliminary experiment (see Materials and Methods section)

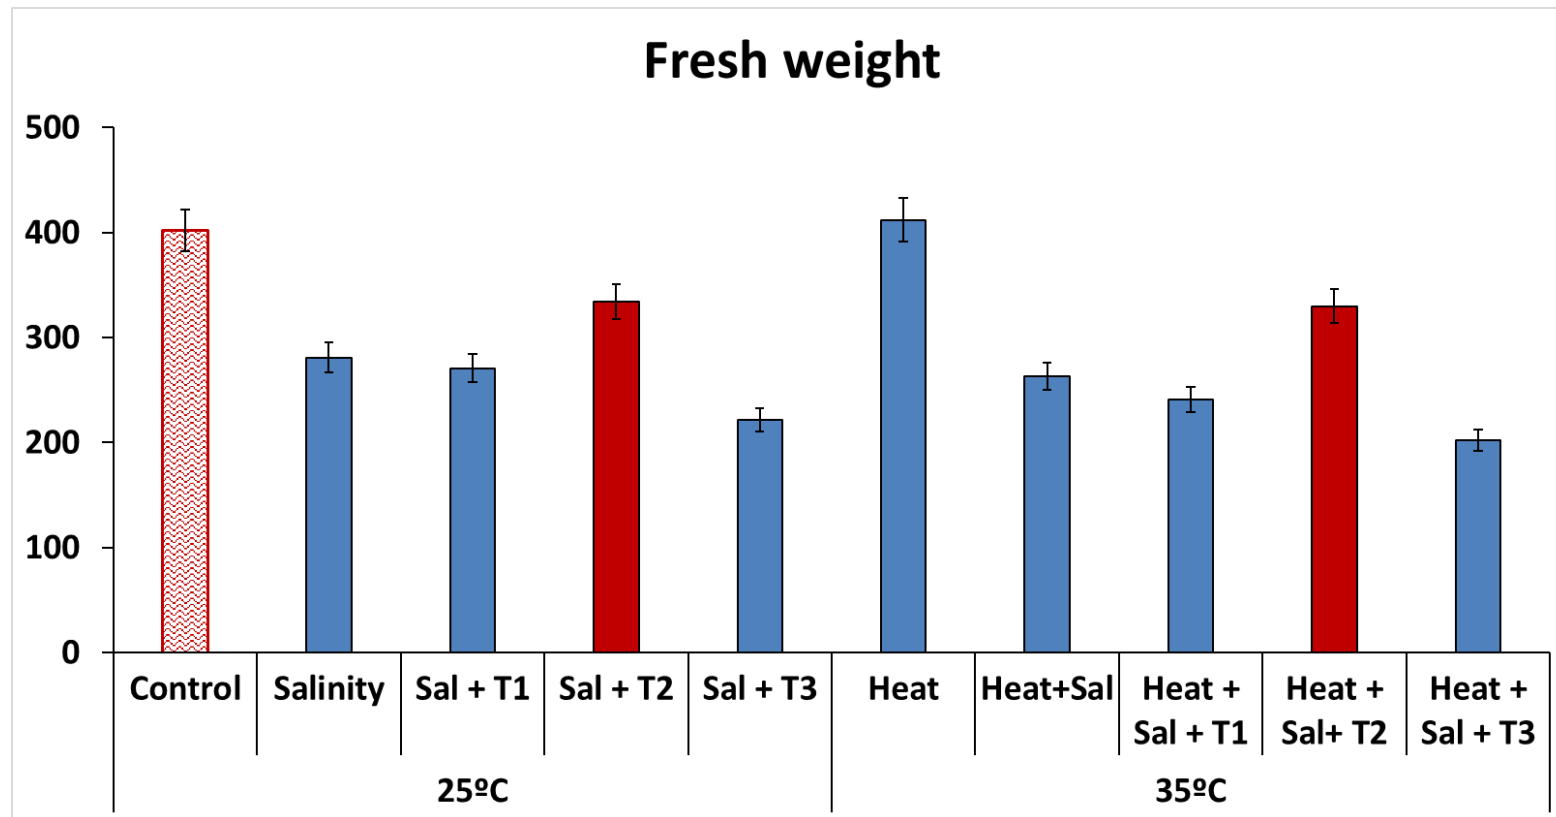

**Supplementary Photograph S1.** Photograph of the experimental design in one of the greenhouses used for our experiments.

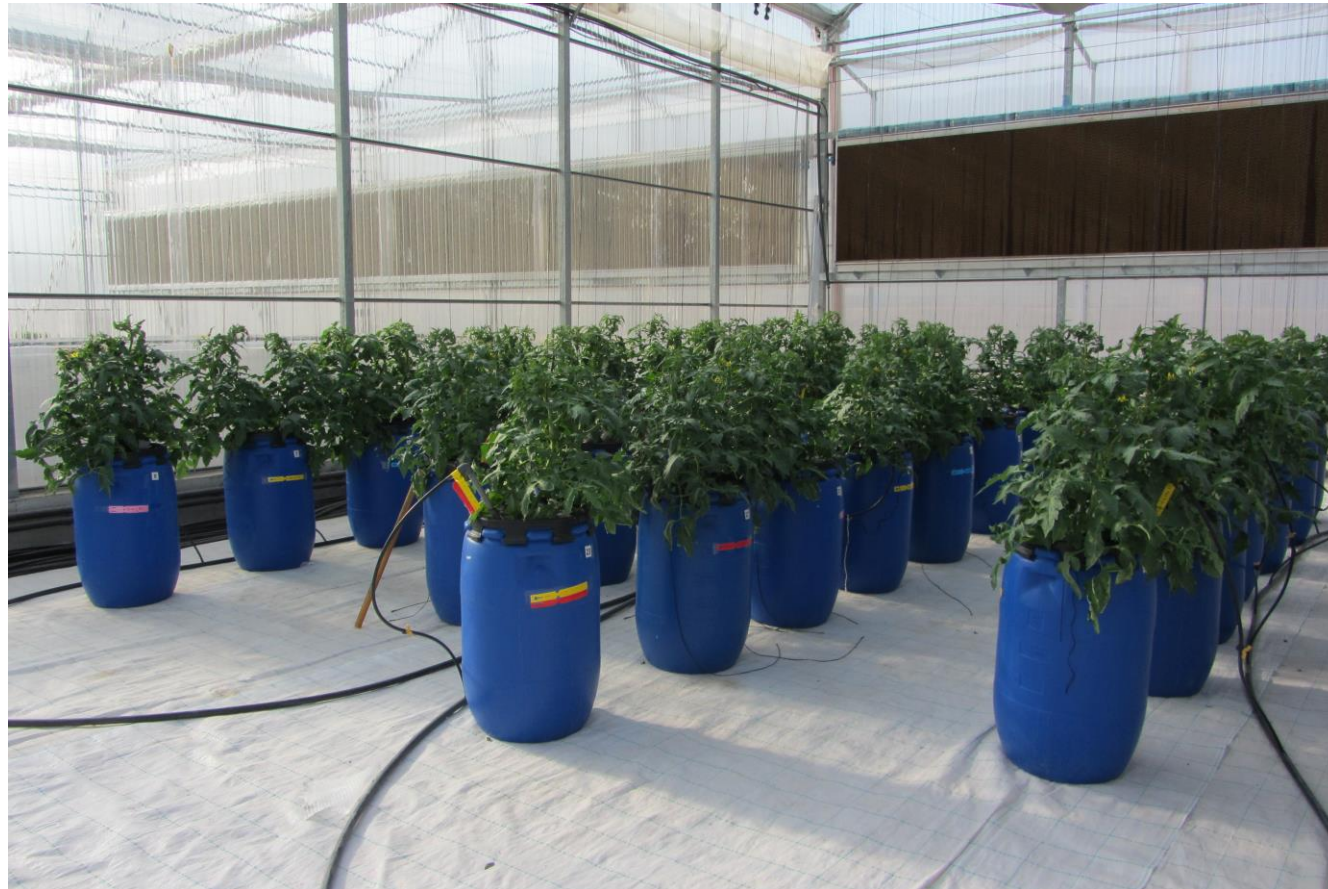

Supplement: antioxidants-08-00081-s001.pdf [file antioxidants-08-00081-s001.pdf]
